## Correspondence

### PEEP with IMV Apparatuses

*To the Editor:*—The article, "A Variation of the Intermittent Mandatory Ventilation Assembly" (ANESTHESIOLOGY 44:182-184, 1976), left me a bit troubled. Dr. Cross describes an IMV inspiratory-limb T-piece assembly that is simpler and much less clumsy than the standard CPAP assembly often used with IMV. Since the T-piece assembly is open to ambient air, Dr. Cross states that "this precludes its use with PEEP." He states that inspiration from ambient pressure is undesirable for a patient on PEEP. My clinical experience with PEEP and IMV contradicts these assumptions. If Dr. Cross' assumptions are widespread, some clarification of the basic nature of PEEP is worthwhile.

PEEP is positive end-expiratory pressure. Its proposed mechanism of action is to increase and maintain the functional residual capacity (FRC). CPAP (continuous positive airway pressure) is a type of PEEP, as is CPPV (continuous positive-pressure ventilation). But CPPV and CPAP are not the only forms of PEEP. They are, in fact, forms of *continuous* positive pressure on the lung. Simple, spontaneous PEEP (sPEEP) is pure PEEP. It is basic PEEP in the sense that it allows only a positive pressure against end-expiration, yet allows the recipient to begin each respiration from a point of elevated FRC. Inspiration from ambient pressure does not "preclude" the use of PEEP; it is PEEP if there is a positive end-expiratory pressure. Creation of a "negative" inspiratory pressure at the elevated FRC is consistent with effective PEEP. The actual effect of a CPAP set-up, when the reservoir bag is slightly collapsed during a patient's inspiration, is sPEEP, not CPAP at all. In practice, more adult patients probably receive sPEEP than CPAP with their IMV. From a cardiovascular standpoint, inspiration from ambient pressure during PEEP might be an advantage.

Dr. Cross is mistaken if he is suggesting that PEEP without CPAP is ineffective. His T-piece apparatus may be used in IMV with

PEEP. Whether in use with IMV (as with the IMV apparatus described) or in use alone, sPEEP is an effective application of PEEP and may be used in place of CPAP.

I personally began to use sPEEP without IMV in patients in early 1971 in Viet Nam, where there was a severe shortage of compressed gasses and respirators. Since April 1973, after my introduction to IMV by J. B. Downs, I have used sPEEP extensively with IMV with a T-piece set-up quite similar to that described by Dr. Cross. A PEEP with IMV by this method is clinically as effective as PEEP by IMV with a CPAP inspiratory assembly.

JOHN S. GILLICK, M.D.  
Assistant Chief, Anesthesiology  
Letterman Army Medical Center  
The Presidio of San Francisco  
San Francisco, California 94129

(Accepted for publication May 20, 1976.)

*To the Editor:*—Although the volume of terminologies used to describe the various uses of end-expiratory pressure is cumbersome, Dr. Gillick raises a very important question that is more than mere semantics. The question is whether it is desirable to use an IMV system with positive end-expiratory pressure in which the patient's spontaneous inspirations begin at ambient pressures.

In such a system, the patient would exhale to a positive end-expiratory pressure, but to initiate spontaneous inspiratory air flow, he would have to generate an airway pressure down to at least ambient, and perhaps into negative ranges if the resistance of the valves, humidifiers, and remainder of the system is taken into account.

At the time my paper was written, I was unaware of any studies of the physiologic implications of such an IMV system. The beneficial effects of ambient inspiratory pressure with respect to cardiovascular physiology is a point well made. In addition, the functional residual capacity should not decrease in such a system. However, Dr. Gillick does not address the work of breathing.

Recent work by Dr. J. B. Downs (personal

The opinions expressed by the writer and the publisher herein are their own and may not be considered an official expression of the Department of the Army.

communication) lends support to the advantages Dr. Gillick mentions, particularly in patients with essentially normal compliance. However, in patients who have abnormally low compliance, the work of breathing becomes so great that it must be weighed against the cardiovascular benefits in a given patient. To do this, one must be able to measure cardiac output, airway pressure, and intrapleural pressure.

In the less critically ill patient, such a problem may be academic, and the use of ambient inspiratory pressures could well be an advan-

tage. However, I cannot recommend the use of the system I described for a patient with decreased compliance who needs high positive end-expiratory pressure.

I thank Dr. Gillick for pointing out a statement that I used with perhaps too broad a connotation.

DAVID A. CROSS, M.D.  
*The Jewish Hospital of St. Louis  
St. Louis, Missouri 63110*

(Accepted for publication May 29, 1976.)

## Endotracheal Tube Obstruction

*To the Editor:*—The insertion of an endotracheal tube does not completely guarantee the patency of the airway. Obstruction has occurred due to kinking, cuff displacement, compression, or the presence of a foreign body, clotted blood or dried secretions.<sup>1</sup> The use of clear plastic disposable tubes has diminished the risk of obstruction due to a foreign body.

Shaw<sup>2</sup> described a case of obstruction of a metal endotracheal connector the cause of which was revealed only when the connector was sawn open, the foreign matter proving to be hardened plastic whose source was never determined.

It is axiomatic that all anesthetic equipment be correctly checked and proven to be in working order prior to use. Occasionally, however,

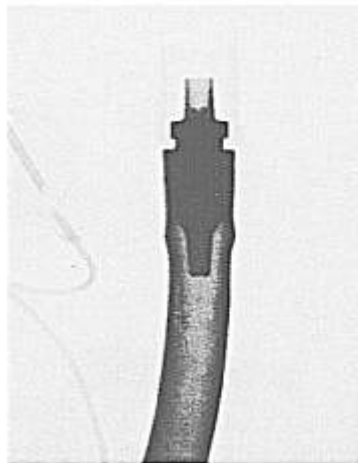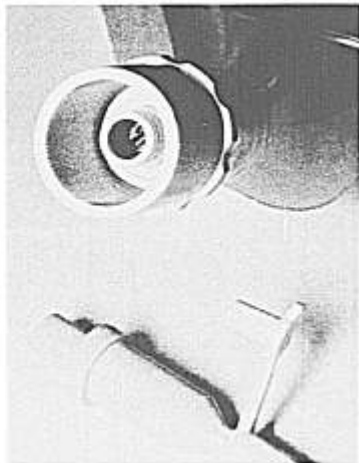

FIGURES 1 and 2.
